# Supplementary material for: Cohort Profile: CArdiovascular Risk in patients with DIAbetes in NAvarra (CARDIANA cohort)
Source: PubMed Central journal article supplement (PMC9872484; doi:10.1136/bmjopen-2022-066052), 2023-01-20
Supplement: bmjopen-2022-066052supp001.pdf [file bmjopen-2022-066052supp001.pdf]

**Supplementary Table S1:** Original Data Sources used for the creation of the T1D and T2D cohorts<sup>Ω</sup>

|                                                                                                                                                                                                                                                                                                                                                                                                                                                                                                                                            |
|--------------------------------------------------------------------------------------------------------------------------------------------------------------------------------------------------------------------------------------------------------------------------------------------------------------------------------------------------------------------------------------------------------------------------------------------------------------------------------------------------------------------------------------------|
| <b>ATENEA –The Primary Care Electronic Medical Record System of Navarra</b>                                                                                                                                                                                                                                                                                                                                                                                                                                                                |
| <i>What contains:</i> out-hospital data. Includes demographic information, visits to primary care services (data and type), health problems, life style, detailed clinical data, laboratory results and drug prescription data.<br><i>Code system used:</i> ICPC-2 International Classification of Primary Care, version 2<br><i>Implemented:</i> in 2003, with a 100% of use in 2008                                                                                                                                                      |
| <b>LAKORA – Population Information System (within the Health system)</b>                                                                                                                                                                                                                                                                                                                                                                                                                                                                   |
| <i>What contains:</i> Basic information on coverage, insurance modality, pharmaceutical copayment status, primary healthcare district, country of origin and other administrative data.<br><i>Code system used:</i> free text<br><i>Implemented:</i> in 2003, with a 100% of use in 2008                                                                                                                                                                                                                                                   |
| <b>MORTALITY Registry</b>                                                                                                                                                                                                                                                                                                                                                                                                                                                                                                                  |
| What contains: Date and cause of death<br><i>Code system used:</i> International Classification of Diseases ICD-10-ES                                                                                                                                                                                                                                                                                                                                                                                                                      |
| <b>HIS-LEIRE (with the Minimum Basic Data Set, MBDS)</b>                                                                                                                                                                                                                                                                                                                                                                                                                                                                                   |
| <i>What contains:</i> It contains the MBDS, with socio-demographic and clinical information on all hospital discharges and major ambulatory surgery in the hospitals of Navarra, including partnership hospitals. It also contains information about visits to specialist or to day hospitals<br><i>Code system used:</i> International Classification of Diseases; ICD9CM until December, 2015 and ICD-10-ES from January, 2016 on.<br><i>Implemented:</i> The MBDS was compulsory in Spain since 1992. HIS-LEIRE had 100% of use in 2003 |
| <b>HCI- Clinical data from specialized care</b>                                                                                                                                                                                                                                                                                                                                                                                                                                                                                            |
| <i>What contains:</i> comprehensive information of specialized care, outpatient consultation, lab test, images, visits and other data from specialized care.<br><i>Code system used:</i> free text<br><i>Implemented:</i> In 2001, with 100% of use in 2008                                                                                                                                                                                                                                                                                |
| <b>T1D registry</b>                                                                                                                                                                                                                                                                                                                                                                                                                                                                                                                        |
| <i>What contains:</i> demographic and clinical information of all patients with T1D diabetes to estimate incidence, prevalence, morbidity and mortality of T1D patients<br><i>Implemented:</i> in 2014, legally approved by formal order 37/2014                                                                                                                                                                                                                                                                                           |
| <b>Population registry</b>                                                                                                                                                                                                                                                                                                                                                                                                                                                                                                                 |
| <i>What contains:</i> At individual level: study level, nationality, labor force status (employed, unemployed, pensioner); at area-level (census tract): average income (2013), % unemployed, %immigration, % people without studies<br><i>Code system used:</i> For study level: Normalized Classification of Education (CNE) used for census in the INE (National Institute of Statistics) <sup>£</sup>                                                                                                                                  |
| <b>LAMIA</b>                                                                                                                                                                                                                                                                                                                                                                                                                                                                                                                               |
| <i>What contains:</i> e-prescription paper-free system with both prescriptions and dispensations, connected to all community pharmacies in the region<br><i>Code system used:</i> Anatomical Therapeutic Chemical (ATC) code<br><i>Implemented:</i> In 2013, with 100% of use in 2014. Before 2014, information on prescriptions was obtained from ATENEA.                                                                                                                                                                                 |

<sup>Ω</sup> For future updates of the cohort, the Results Analysis Database of Navarre (BARDENA) will be used

<sup>£</sup> <https://idapadron.ine.es/repositorio/legislacion/Anexo%20II.pdf>

**Supplementary Table S2:** Data information available in the T1D and T2D cohorts, by type of information and data source

| Data source                                                                         | Variables                                                                                                                                                                                                                                                                                                                                                                                                                                                 |
|-------------------------------------------------------------------------------------|-----------------------------------------------------------------------------------------------------------------------------------------------------------------------------------------------------------------------------------------------------------------------------------------------------------------------------------------------------------------------------------------------------------------------------------------------------------|
| <b>Socioeconomic data</b>                                                           |                                                                                                                                                                                                                                                                                                                                                                                                                                                           |
| Population Registry LAKORA-TIS                                                      | Date of birth, country of origin, study level, marital status, working status and mean income of the assigned basic health zone                                                                                                                                                                                                                                                                                                                           |
| ATENEA-TIS                                                                          | Pharmaceutical co-payment category                                                                                                                                                                                                                                                                                                                                                                                                                        |
| ATENEA-TIS                                                                          | Date of birth, date of inclusion/withdrawal in the Navarra health system, general practitioner identification                                                                                                                                                                                                                                                                                                                                             |
| <b>Previous diagnosis and past history of diseases</b>                              |                                                                                                                                                                                                                                                                                                                                                                                                                                                           |
| ATENEA                                                                              | Weighted GMA, Past-history of myocardial infarction, congestive heart failure, cerebrovascular disease, peripheral vascular disease, retinopathy, neuropathy, nephropathy, foot lesions, dementia, chronic pulmonary disease, rheumatic disease, peptic ulcer disease, hemiplegia or paraplegia, neoplasm, liver disease, AIDS/HIV. Past history of CVD events coded in one of the following ICPC-2 codes: K74, K75, K76, K77, K89, K90, K91              |
| <b>Personal cardiovascular risk factors, laboratory test and lifestyle behavior</b> |                                                                                                                                                                                                                                                                                                                                                                                                                                                           |
| ATENEA                                                                              | Sex, age, physical activity, alcohol consumption, smoking status, self-management of pharmacological treatment, time since diagnosis, office, and laboratory test parameters (and dates): weight, height, systolic blood pressure (SBP), diastolic blood pressure (DBP), Total Cholesterol, LDL, HDL, triglycerides, creatinine, haemoglobin, glycated haemoglobin, fasting glucose, glomerular filtration rate (GFR), urine albumin to creatinine ratio. |
| The HCI database                                                                    | Data collected by specialist care units: office and laboratory test parameters and procedures (date and value)                                                                                                                                                                                                                                                                                                                                            |
| <b>Use of health services</b>                                                       |                                                                                                                                                                                                                                                                                                                                                                                                                                                           |
| HIS-LEIRE                                                                           | Hospital or emergency room admissions, diagnostics, procedures and dates of admission and discharge. Number of consultations to specialist by medical specialty                                                                                                                                                                                                                                                                                           |
| ATENEA                                                                              | Number of yearly telephonic/physical consultation, office/home-based consultation and type of service provided (nurse/ medical/social worker/Emergency room)                                                                                                                                                                                                                                                                                              |
| <b>Drug treatment use</b>                                                           |                                                                                                                                                                                                                                                                                                                                                                                                                                                           |
| LAMIA                                                                               | Treatment ATC code, date of prescription and date of dispensation                                                                                                                                                                                                                                                                                                                                                                                         |
| ATENEA                                                                              | Treatment ATC code and date of prescription (before 2014)                                                                                                                                                                                                                                                                                                                                                                                                 |
| <b>Diabetes classification</b>                                                      |                                                                                                                                                                                                                                                                                                                                                                                                                                                           |
| T1D registry                                                                        | Type 1 diabetes confirmation and onset date                                                                                                                                                                                                                                                                                                                                                                                                               |
| <b>Outcomes</b>                                                                     |                                                                                                                                                                                                                                                                                                                                                                                                                                                           |
| Mortality registry                                                                  | Cause of death and date ICD-10-ES                                                                                                                                                                                                                                                                                                                                                                                                                         |
| HIS-LEIRE/M BDS                                                                     | Minimum Basic Data Set (MBDS): ICD-9CM until December 31 <sup>st</sup> , 2015 and ICD-10-ES from January 1 <sup>st</sup> , 2016.                                                                                                                                                                                                                                                                                                                          |

**Supplementary Table S3:** ICD-9 and ICD-10 codes for the definition of the outcome

| <b>Fatal CVD event</b>                              |                    |                   |
|-----------------------------------------------------|--------------------|-------------------|
| <i>Endpoints included</i>                           | <i>ICD10-codes</i> | <i>ICD9-codes</i> |
| Hypertensive disease                                | I10-16             | 401 – 405         |
| Ischemic heart disease                              | I20-25             | 410 - 414         |
| Arrhythmias, heart failure                          | I46-52             | 426 - 429         |
| Cerebrovascular disease                             | I60-69             | 430 - 438         |
| Atherosclerosis/AAA                                 | I70-73             | 440 - 443         |
| Sudden death and death within 24h of symptom onset  | R96.0-96.1         | 798.1 , 798.2     |
| <i>Excluded from the above endpoint:</i>            |                    |                   |
| Myocarditis, unspecified                            | I51.4              | 426.7             |
| Subarachnoid haemorrhage                            | I60                | 429               |
| Subdural haemorrhage                                | I62                | 430               |
| Cerebral aneurysm                                   | I67.1              | 432.1             |
| Cerebral arteritis                                  | I68.2              | 437.3             |
| Moyamoya                                            | I67.5              | 437.4             |
| <b>Non-fatal CVD event</b>                          |                    |                   |
| <i>Endpoints included</i>                           |                    |                   |
| Non-fatal myocardial infarction                     | I21-I23            | 410               |
| Non-fatal stroke                                    | I60-69             | 430-438           |
| <i>Excluded from the non-fatal stroke endpoint:</i> |                    |                   |
| Subarachnoid hemorrhage                             | I60                | 429               |
| Subdural hemorrhage                                 | I62                | 430               |
| Cerebral aneurysm                                   | I67.1              | 432.1             |
| Cerebral arteritis                                  | I68.2              | 437.3             |
| Moyamoya                                            | I67.5              | 437.4             |

Cardiovascular Disease (CVD) event defined with Codes considered in SCORE2<sup>[16]</sup>

Only primary codes are considered
